1                   **Mechanical instabilities of aorta drive blood stem cell production:**  
2                                           **a live study.**

3  
4   Nausicaa Poulet<sup>1</sup>, Ivan Golushko<sup>2,3</sup>, Vladimir Lorman<sup>2</sup>, Jana Travnickova<sup>1</sup>, Dmitryi Chalin<sup>3</sup>,  
5   Sergei Rochal<sup>3</sup>, Andrea Parmeggiani<sup>1,2</sup> and Karima Kissa<sup>1,\*</sup>.

6  
7   <sup>1</sup> DIMNP, CNRS, INSERM, Univ Montpellier, Montpellier, France

8   <sup>2</sup> Laboratoire Charles Coulomb, CNRS, Univ Montpellier, Montpellier, France

9   <sup>3</sup> Faculty of Physics, Southern Federal University, 5 Zorge str., Rostov-on-Don, Russia

10  
11   \*Correspondence: [karima.kissa-marin@umontpellier.fr](mailto:karima.kissa-marin@umontpellier.fr)

12  
13  
14  
15  
16           **During embryogenesis of all vertebrates, haematopoietic stem/progenitor cells**  
17 **(HSPCs) extrude from the aorta by a complex process named Endothelial-to-**  
18 **Haematopoietic Transition (EHT). HSPCs will then colonize haematopoietic organs**  
19 **allowing haematopoiesis throughout adult life. The mechanism underlying EHT**  
20 **including the role of each aortic endothelial cell within the global aorta dynamics**  
21 **remains unknown. In the present study, we show for the first time that EHT involves the**  
22 **remodelling of individual cells within a collective migration of endothelial cells which is**  
23 **tightly orchestrated, resulting in HSPCs extrusion in the sub-aortic space without**  
24 **compromising aorta integrity. By performing a cross-disciplinary study which combines**  
25 **high resolution 4D imaging and theoretical analysis based on the concepts of classical**  
26 **mechanics, we propose that this complex developmental process is dependent on**  
27 **mechanical instabilities of the aorta preparing and facilitating the extrusion of HSPCs.**

28  
29  
30   *We dedicate this work to the memory of our friend and colleague, V. Lorman.*

31

## 32 **Introduction**

33

34 Transplantation of human blood cells is essential to regularly save lives on a large-scale.  
35 However, this method requires an exogenous allogenic source to avoid histoincompatibility  
36 as well as graft versus host disease associated problems. Currently, haematopoietic  
37 stem/progenitor cells (HSPCs) can only be produced *in vitro* by methods involving genetic  
38 cellular reprogramming. Different groups succeeded in it, however these approaches remain  
39 scientifically and technically challenging<sup>1-4</sup>. Moreover, the presence of transgenes in the  
40 genome of reprogrammed human HSPCs represents an important clinical risk<sup>5</sup>.

41 In order to develop new methods to generate HSPCs *in vitro* and control their fate after  
42 transplantation, we need to further deepen our knowledge on blood cells ontogenesis at tissue  
43 and organism levels, considering also novel features like biomechanical forces experienced by  
44 HSPCs in physiological conditions. Indeed, the 3D *in vivo* structure of the tissue from which  
45 HSPCs are generated is subjected to mechanical forces that influence cellular properties and  
46 processes like cell migration, adhesion and polarity<sup>6,7</sup>. Moreover, mechanical stress is known  
47 to have a major impact on gene expression modulation and consequently on developmental  
48 processes<sup>8</sup>, inflammation and cancer<sup>9</sup>.

49 In this article, we address for the first time the question of HSPCs production from the aorta  
50 in relationship with the growth of the zebrafish embryo, the most widely used animal model  
51 to study developmental processes in real time. We discuss and underline that, together with  
52 haemodynamic forces, the growth of the whole embryo generate mechanical stresses on the  
53 aorta and play a crucial role in blood production.

54 Previously, we and colleagues have demonstrated that HSPCs emerge in the Aorta Gonad  
55 Mesonephros (AGM) region<sup>10-13</sup>, from the ventral wall of the dorsal aorta (DA)<sup>14-16</sup>. We  
56 named this process Endothelial-to-Haematopoietic Transition or EHT<sup>14</sup>. In zebrafish, EHT  
57 takes place during a specific time window between 30 and 65 hours post fertilization  
58 (h.p.f.)<sup>12,14,17</sup>. Systematic tracking of aortic endothelial cells (EC) in live embryos showed that  
59 HSPCs emerge from the aortic ventral floor through a process that involves a strong shape  
60 change followed by the egress of single cells from the aortic ventral wall into the sub-aortic  
61 space<sup>14</sup>. Moreover, we and colleagues observed that the extrusion of HSPCs was aborted  
62 when the *runx1* transcription factor essential for HSPCs emergence was inhibited<sup>14,18</sup>.  
63 Surprisingly, this inhibition affected neither aorta formation nor any events preceding HSPCs  
64 extrusion, such as aorta radius dilation and contraction. A more recent study has then put in  
65 evidence with wealth of details the cytoskeletal processes occurring in the single cell  
66 dynamics during the HSPC egress from the aorta<sup>19</sup>.

67 In the present study, with the help of 4D confocal microscopy, we follow and quantify at  
68 tissue level, the whole aorta behaviour as well as the one of its cells throughout EHT between  
69 24 and 72 h.p.f. We put in evidence important structural changes of the aorta and the  
70 collective migration of its lateral cells down to the aorta floor prior to HSPC egress. These  
71 phenomena result in a global aorta remodelling in terms of number and localisation of  
72 endothelial cells, thus showing an ongoing global cellular reorganisation of the tissue that  
73 assures aorta integrity during EHT. We then analyse the role of the actin cytoskeleton both in  
74 emerging and neighbouring cells during the HSPCs extrusion process.

75 Based on these observations and applying general principles of mechanics to the novel  
76 context of EHT, we relate the overall aorta remodelling and EHT egress to mechanical  
77 instabilities. This cross-disciplinary analysis indeed reveals that mechanical instabilities,  
78 induced by different stresses arising from the inhomogeneous growth of the aorta and its  
79 interaction with surrounding growing tissues, play a key non-specific role in HSPCs  
80 extrusion. Thus, not only haemodynamic forces, but also stresses induced by the global  
81 zebrafish embryonic growth<sup>17</sup> are essential for haematopoiesis.

82

## 83 Results

84

85 **EHT is associated with important aorta remodelling.** To investigate the mechanisms  
86 underlying EHT, we first carried out a 4D confocal microscopy imaging of this process in a  
87 physiological context. For that, we image the trunk of zebrafish embryos (**Fig. 1a**) including  
88 diverse structures such as the DA, the cardinal vein (CV), the notochord and the muscles  
89 surrounding the DA (**Fig. 1a-c**) between 30 and 65 h.p.f.

90 The imaging revealed strong changes of the morphology of the whole DA with time (**Fig. 1b-**  
91 **f, Supplementary Movie S1**). From 24 to 42.5 h.p.f., we observed a drastic increase of the  
92 aorta diameter from  $24 \pm 0.8 \mu\text{m}$  to  $32 \pm 0.9 \mu\text{m}$  (**Fig. 1c, 1g**) followed by the emergence of a  
93 pattern with alternating thinner and thicker diameter regions (**Fig. 1c-d, 1g-h**) with a relative  
94 amplitude variation ranging from 17% to 33% the average aorta diameter.

95 At 42.5 h.p.f., the average diameter of the DA starts to decrease (**Fig. 1f, 1g**) and at 65 h.p.f.,  
96 the aorta original cylindrical shape and diameter are restored which corresponds to the end of  
97 EHT (**Fig. 1d-f, 1g**). To determine if there is a causal link between the change in aorta  
98 diameter and cell extrusion, we followed the behaviour of individual cells leaving the DA  
99 (**Fig. 1e-f, arrowheads correspond to regions where HSPCs emerged**). Our observations  
100 showed that interestingly, HSPC extrusion rate peaks between 42.5 and 52 h.p.f. precisely  
101 when the aorta diameter starts to decrease.

102

103 **Aorta dilation is not associated with cell mitosis.** To further assess EC behaviour during  
104 aorta dilation and HSPC extrusion, we looked at EC division and whether an increase of cell  
105 number can explain vessel expansion or compensate for HSPC emerging from the aorta floor.  
106 We used a zebrafish transgenic line that expresses a marker of the S/G2/M phase of the cell  
107 cycle, mVenus-zGeminin<sup>20</sup>. This marker was specifically expressed under the *kdrl* promoter,  
108 allowing visualization of ECs during mitosis<sup>20</sup>. We quantified the number of EC divisions in  
109 the trunk and in the tail between 27 and 72 h.p.f. We found that many division events occur in  
110 the tail region ( $33.0 \pm 2.8$  EC divisions at 48 h.p.f), allowing development of the Caudal  
111 Haematopoietic Tissue (CHT) (**Fig. 1i**). In contrast, at the peak of EHT (at around 48 h.p.f.),  
112 we quantified a mean of  $2.2 \pm 0.6$  ECs dividing in the *whole* AGM area (**Fig. 1i**), far under  
113 what would have been needed to compensate for the estimated 25 HSPCs emerging from the  
114 aorta during the whole AGM<sup>14</sup>. Overall, between 27 and 72 h.p.f., we observed only a few  
115 EC divisions in the trunk region: the total number of cells in this area essentially decreases  
116 throughout the EHT process. Thus, additional surface area, for the aorta dilation and later for  
117 integrity maintenance during HSPC extrusion, should be provided exclusively by cell  
118 deformation.

119

120 **HSPCs migrate collectively from the sides towards the ventral part of the aorta.** To  
121 quantify the precise contribution of each EC to the EHT process, we followed the fate and  
122 behaviour of individual cells between 30 and 60 h.p.f. in the whole trunk region of the DA. To  
123 do so, we used the double transgenic line *kdrl:nls-GFP/kdrl:caax-mCherry*, allowing  
124 respective visualization of nucleus and membrane of ECs through time. We discovered that  
125 ECs undergo substantial rearrangements in the trunk region between 30 and 45 h.p.f. (**Fig. 2a-**  
126 **b**). Interestingly, during this time window ECs migrate massively from the lateral side of the  
127 DA to the floor (**Fig. 2a-h with arrows**). The number of cells in the DA floor peaks at about  
128 40 h.p.f., when cell migration from the sides fully compensate for cell egress, and then  
129 steadily declines afterwards (**Fig. 2i**) as lateral cells stop migrating towards the DA floor. The  
130 decline is due to the extrusion of cells from the aorta floor into the sub-aortic space. The  
131 number of ECs forming the dorsal aorta in the trunk region therefore strongly decreases from  
132 the start to the end of the process (from  $12.1 \pm 0.9$  cells/somite at 30 h.p.f. to  $7.9 \pm 0.3$   
133 cells/somite at 60 h.p.f.,  $p$ -value=0.009) (**Fig. 2a-c, 2i-j**). Remarkably, the number of ECs  
134 localized in the DA roof (facing the notochord) is essentially constant during the whole  
135 process (**Fig. 2i**).

136

137 **HSPCs extrusion requires collective EC morphology changes.** In order to determine the  
138 contribution of neighbouring ECs to the extrusion of HSPCs, we compared the morphology of  
139 the emerging cells versus the morphology of their neighbours during EHT. Imaging of the  
140 double transgenic line *kdrl:utrophin-CH-GFP/kdrl:nls-GFP* allowed to visualize the  
141 boundaries of each individual EC together with its nucleus. Quantification of the cell area  
142 between 40 and 60 h.p.f. showed that both emerging cells and their neighbours undergo  
143 drastic and rapid morphology changes (**Fig. 3**). The area of cells prior to their extrusion  
144 significantly reduces and shape changes from flat endothelial to a round plate-like cell ( $-$   
145  $69\% \pm 5\%$  decrease in cell area) (**Fig. 3a-b, 3e-g**). In contrast, neighbouring lateral cells  
146 increase their area comparably ( $+60\% \pm 9\%$  increase in cell area) (**Fig. 3c-d, 3e-f and 3h**).  
147 These data confirm that in the absence of divisions in the trunk region, the loss of cells  
148 through EHT is mainly compensated by the deformation of the lateral ECs thus assuring  
149 global aorta integrity.

150

151 **Extrusion is finalized by actin ring closure around the emerging HSPC.** We then focused  
152 on the cytoskeletal activity of ECs to understand the mechanism of this dramatic cell-to-tissue  
153 reorganization process. First, we used the *kdrl:utrophin-CH-GFP* line to mark stable F-actin  
154 in ECs<sup>21</sup>. 4D confocal imaging during the period of rearrangement (42-60 h.p.f.) showed that  
155 EC junctions are highly dynamic and have tight cell-to-cell membrane boundaries  
156 (**Supplementary Movie S2**). Because of the significant vascular cell deformation during  
157 EHT, we then analysed the interplay between cytoskeleton activity and HSPCs shape during  
158 the extrusion process. We imaged a double transgenic line *kdrl:utrophin-CH-GFP/kdrl:caax-*  
159 *mCherry* showing respectively stable actin filaments and EC membranes. Live imaging  
160 revealed that the aorta diameter decreases while HSPC extrusion in the sub-aortic space are  
161 driven by the formation and closure of an actin ring surrounding the emerging cells (**Fig. 4,**  
162 **Supplementary Movie S1, Supplementary Movie S3**) as also recently observed by Lancino

163 et al <sup>19</sup>. Transverse view of the aorta shows that the emerging cell membrane and the actin  
164 cytoskeleton co-localize to form a perfect circle that closes as the cell exits the DA floor (**Fig.**  
165 **4a-c Supplementary Movie S3**). As the *kdrl:utrophin-CH-GFP* line displays a mosaic  
166 expression, not all ECs express Utrophin-CH-GFP and we were therefore able to follow EHT  
167 in cases where only the neighbouring cells expressed the GFP probe. In this scenario, we still  
168 clearly observed the formation (**Fig. 4a, 4d**) and closure of the actin ring (**Fig. 4b-c, e-f**),  
169 suggesting that the neighbouring cells also actively participate in the ring formation and actin  
170 contractile dynamics.

171 In order to visualize all F-actin in the system, we also used a transgenic line expressing  
172 Lifeact (a 17-amino-acid peptide that binds to filamentous actin) fused to green fluorescent  
173 protein (GFP) <sup>22</sup>. Vascular expression of Lifeact-GFP was driven by the VE-cadherin  
174 promoter and this transgenic line was used together with *kdrl:caax-mCherry* to visualize EC  
175 membrane as well. Imaging of *VE-cad: Lifeact-GFP* was consistent with the results obtained  
176 with *kdrl:utrophin-CH-GFP* and we could follow the formation and closure of the actin ring  
177 during EHT (data not shown).

178 To confirm the role of actin polymerization in HSPC extrusion, we treated embryos with  
179 drugs blocking actin assembly, Latrunculin B or Rac inhibitor NSC23766. In treated embryos,  
180 despite the presence of the aorta diameter modulation, the actin cytoskeleton was highly  
181 disrupted and the formation of the actin ring surrounding the emerging cells was not observed  
182 (**Supplementary Fig. 2**). Interestingly, the formation of typical plate-like cells in the aorta  
183 floor preceding HSPCs extrusion was also not observed (data not shown). We also found that  
184 in treated embryos some cells undergoing EHT bent toward the DA lumen: 33%±9% of cells  
185 emerged toward DA lumen in Latrunculin B-treated embryos (**Supplementary Fig. 2**). These  
186 results show the importance of actin polymerization for the acquisition of cell rigidity and the  
187 direction of HSPCs extrusion from the aorta in the sub-aortic space.

188 We further looked at the role of the acto-myosin contraction in HSPC extrusion by subjecting  
189 embryos to drugs blocking myosin contraction, Blebbistatin and ROCK inhibitor Y-27632.  
190 The action of these drugs was very similar to that of the actin-blocking ones. The actin ring  
191 surrounding emerging cells was not observed and HSPC exit took longer with some cells  
192 undergoing fragmentation during the process (**Supplementary Fig. 2**).

193 To quantify the effect of actin polymerization and contraction blocking on haematopoietic  
194 organs colonization such as the CHT by HSPCs, we treated *cd41:GFP* embryos, which  
195 express GFP in HSPCs and thrombocytes <sup>23</sup>, with Latrunculin B, Rho-kinase inhibitor Y-  
196 27632, Blebbistatin and Rac inhibitor NSC23766. For all drugs, except with Rho-kinase  
197 inhibitor Y-27632, we found that the number of HSPCs colonizing the CHT (*cd41+* cells)  
198 between 52 and 72 h.p.f. was significantly lower in treated embryos compared to control  
199 (**Supplementary Table 1**). Live imaging of EHT reveals that HSPCs bend without achieving  
200 complete extrusion. Part of them bents in the wrong direction, i.e. in the aorta lumen, while  
201 others cells burst as previously observed after *runx1* gene inactivation <sup>14</sup>. Interestingly, none  
202 of the drugs blocking actin polymerisation or contraction was found to affect EC  
203 rearrangement occurring during the earlier stages of EHT (data not shown).

204 All together these results show that the acto-myosin cytoskeleton plays an essential role  
205 mainly in the final step of EHT, precisely to complete the extrusion of HSPCs from the aorta  
206 floor to the sub-aortic space.

207 **Cellular and tissular levels are dynamically coordinated during EHT.** Structuring up our  
208 observations, the EHT transition is a collective phenomenon organized on both tissular and  
209 cellular spatial scales (**Fig. 5**).

210 At tissue level, EHT is organized in two phases. In the first phase, from 28 to 42.5 h.p.f. the  
211 DA diameter increases (**Fig. 1g and 5a**). At 40 h.p.f. aorta's shape of straight cylinder is  
212 distorted by an average diameter modulation along the aorta longitudinal direction (**Fig. 1h**  
213 **and 5a**).

214 During this first tissular phase, between 30 and 40 h.p.f., and concurrent with the diameter  
215 modulation, at cellular level ECs reorganize themselves spatially and cells, localized on the  
216 side of the aorta, migrate towards its floor. This cell migration is a quick process, which takes  
217 on average  $5.9h \pm 0.7h$  (counted for 18 cells in 15 individuals).

218 The second tissular phase corresponds to the diameter reduction and the disappearing of the  
219 diameter modulation up to the end of EHT (from about 42.5 to 65 h.p.f.). Here, global  
220 morphological reorganization of DA is coupled with the dynamics of cells that, once localized  
221 at the aorta floor, undergo a drastic morphological change, shaping from a flat EC to a round  
222 plate-like cell. As cells round up, they undergo a strong antero-posterior contraction. In  
223 parallel, neighbouring ECs increase their area and compensate for the surface reduction of  
224 emerging HPSC cells and eventually for their extrusion. The whole cellular dynamics assures  
225 aorta integrity while DA diameter decreases. This important morphology and identity tissular  
226 and cellular remodelling take on average  $9.2h \pm 1.5h$  (counted for 6 cells in 6 individuals) and  
227 occur between 37 and 55 h.p.f. The closure of the actin rings around the emerging cells allows  
228 for their individualization from the aorta. The cellular extrusion and release from the aorta  
229 take on average  $7.5h \pm 1.3h$  (counted for 10 cells in 10 individuals). Remnant ECs finally  
230 complete the remodelling of the aorta by fully recovering its initial diameter and cylindrical  
231 geometry (**Fig. 1e-f and 5**).

232

## 233 **Discussion**

234

235 In this article, we study and characterise the EHT process at the cellular and tissular level. We  
236 quantify the temporal sequences of cells rearrangements, shape modifications, and their  
237 coordination with cellular migration events, whilst the DA tissue takes a peculiar tri-  
238 dimensional shape in the trunk region. Thanks to 4D imaging and drug treatment, we have  
239 organized the EHT process in two different phases of DA dilation and contraction, and  
240 analysed the cellular events occurring.

241 To decipher the mechanisms that control the DA shape at various stages of EHT, we discuss  
242 here why the mechanical properties of the DA endothelium play an important role in the  
243 global control of the spatiotemporal organisation of the DA.

244 In the last century, theoretical methods of classical elasticity have been successful to describe  
245 instabilities in metallic pipes and similar mechanical systems that, once subjected to a critical  
246 load, change their shape and buckle. More recently, the generalization and adaptation of linear  
247 elasticity theory for the needs of biophysical systems has allowed the mechanical description  
248 of living matter like lipid membranes, cells or tissues<sup>24-26</sup>. Moreover, high susceptibility of  
249 biological systems, residing near the critical point to the variation of external parameters, is  
250 supposed to be often used in nature to control and regulate various processes<sup>27</sup>.

251 We argue here that mechanical instabilities are involved in the DA shape transition during  
252 EHT. More precisely, global variations of aorta shape in the trunk region assisting EHT are  
253 the result of instabilities driven by mechanical stresses of various natures acting on the DA.  
254 These stresses emerge spontaneously from the DA inhomogeneous growth and its interaction  
255 with surrounding tissues rather than from genetically preprogrammed features of  
256 embryogenesis. As a matter of fact, the specific diameter modulation in the lower part of the  
257 DA appears even when the morphogenetic program of EHT is strongly altered under  
258 inhibition of the *runx1* transcription factor<sup>14</sup>. Moreover, cytoskeleton-blocking drugs only  
259 affect the final step of extrusion of HPSC, but not at all the previous phases involving the  
260 cellular tissue remodeling and the global shape change of the DA.

261 The DA is formed by a single monolayer of cells contrary to an adult aorta multilayer  
262 complex organization<sup>14,28</sup>. Therefore, in first approximation, DA can be considered as a thin  
263 cylindrical elastic shell. DA is much softer than metallic pipes, and its shape is finally defined  
264 by the opposition of different active factors. These factors include: the inner hemodynamic  
265 forces, the outer compressions exerted by the surrounding tissues due to embryonic growth  
266 and development<sup>17</sup> and the in-plane stresses generated in the aorta tissue by ECs shaping and  
267 migration as observed in our experiments. The typical timescales for such developmental  
268 events are of several hours, thus much longer than the typical time of aortic elastic response to  
269 the heart-beat (fractions of seconds), for instance<sup>29,30</sup>.

270 Classical mechanics predicts that destabilization of a tubular membrane can be associated  
271 with three main modes corresponding to various membrane deformations. These modes are:  
272 *Euler buckling* (a tube's longitudinal axis bends while cross-section remains circular, **Fig.**  
273 **5b**), *transverse buckling* (axis of a tube remains straight, whereas its cross-section takes an  
274 oval shape **Fig. 5c**) and "*corrugation instability*" (a tube preserves its rotational symmetry  
275 along the main axis, but its radius is modulated along the main axis, **Fig. 5d**).

276 Euler buckling of the cylindrical tube can be invoked by the compressive stress along the tube  
277 main axis. If the surrounding tissues were absent, the DA stability with respect to this mode  
278 would have been determined almost exclusively by the bending rigidity of the tube wall.  
279 However, as it is proven by the experiment, long-wave buckling instability is irrelevant for  
280 the aorta, because notochord and other tissues surrounding the DA prevent its longitudinal  
281 axis from bending (**Fig. 1 and 5**).

282 Transverse buckling of the cylindrical shell occurs when transverse isotropic (i.e. possessing  
283 the rotational symmetry of the tube) stress in its walls reaches a negative critical value.  
284 Stability with respect to transverse buckling is independent on the tension applied along the  
285 tube axis and is determined by material constants characterizing the system. This type of  
286 mechanical instability also occurs in ordinary rings<sup>31</sup>. Slightly elongated shape of aorta in the  
287 dorsal-ventral direction is preserved throughout the whole process and in our opinion this  
288 shape is due to an anisotropic compression applied by the muscles located on the sides of the  
289 aorta rather than to the transverse buckling instability with spontaneous symmetry breaking.

290 On the contrary, deformation appearing in the DA prior to HSPCs extrusion has a well-  
291 pronounced space periodicity and amplitude (**Fig. 1c-e, 1h**, and **Fig. 5**) which makes it similar  
292 to the corrugation deformation of an axially compressed thin-walled rigid pipe<sup>32</sup>. Importantly,  
293 space period and amplitude of the DA diameter modulation lay beyond the cell diameter and  
294 thickness. As it was mentioned before, the blood pressure creates positive stress in DA walls.  
295 Its longitudinal component can be calculated as  $\sigma = R \Delta P / 2h$ , where  $\Delta P$  is a pressure difference  
296 between the interior and the exterior of DA,  $R$  and  $h$  are DA's radius and thickness  
297 respectively. This positive stress cannot induce corrugation since it makes DA even more

298 stable. However, negative compressive stress (inducing the corrugation in the system) can  
299 originate from the difference between the growth rates of the DA and the tissues around it. As  
300 it is shown by our data at about 30 h.p.f., this negative stress eventually overpowers the  
301 positive one associated with blood pressure and leads to the corrugation of the aorta. This  
302 deformation occurs mainly in the ventral part of the DA where the migrating cells converge,  
303 and the compressive stress is maximal. Later on, as the zebrafish embryo develops, exit of the  
304 cells undergoing EHT decreases the effective stress due to the decrease of the equilibrium  
305 surface area of the DA. Consequently, at about 65 h.p.f. the stress drops below the critical  
306 value and the tube regains its initial not-deformed shape (**Fig. 1f, Fig. 5**).

307 As we show experimentally, chemical perturbation or inhibition of acto-myosin contractility  
308 machinery seriously affects only the final event of EHT, i.e. the extrusion of the EHT cell  
309 from the aorta endothelium. Very interestingly, we stress that the initial phases of EHT  
310 resulting in DA shape distortion still occurs in presence of chemical perturbations. Moreover,  
311 the deformation of HSPCs that are preparing to leave the aorta also occurs. What is different  
312 is that, in the drug-treated specimens where the actin rings surrounding the cells are absent,  
313 many cells do not bend outside (as usual) but do bend inside of the aorta. Based on this  
314 observation, we hypothesize that the EHT process is also associated with additional shape  
315 instability of individual cells forming the aorta endothelium. We believe that this second  
316 instability is also provoked by the stress exerted on the DA tissue, whereas the polymerization  
317 of the actin ring and the actin cytoskeleton activity insures the right direction of future HSPC  
318 bending and further facilitates its extrusion in the sub-aortic space toward the cardinal vein.

319 In conclusion, by using 4D fluorescence microscopy, we have characterized qualitatively and  
320 quantitatively different dynamical phases of EHT leading to the generation of circulating  
321 hematopoietic stem cells from the DA. From the analysis of our observations on wild-type,  
322 genetically-modified and chemically-treated zebrafish, we confirmed the important role of the  
323 acto-myosin system in EHT single cell final extrusion<sup>19,33</sup>. Other processes involving the  
324 externalisation of a single cell from a cell layer, such as apoptotic extrusion from the  
325 epithelial layer of the zebrafish embryo epidermis, confirm that actin/myosin contraction is  
326 essential in this process<sup>34</sup>.

327 In particular, we profiled a general mechanism based on mechanical instabilities that prepare  
328 and support the whole EHT prior to a specific genetic control of the process. Importantly, our  
329 interpretation suggests a generic and self-organized mechanism that drives unique collective  
330 events of tissue reorganization such as EHT in the development and growth of complex  
331 organisms.

332 Further on, it will be interesting to develop a more precise mathematical model for the  
333 description of aorta dynamics and study EHT transition in other model systems. Since the  
334 aorta of the zebrafish embryo consists in a limited number of cells, which decreases even  
335 more during the EHT process, it will be important to combine an analytical continuum model  
336 with a coarse-grained approach allowing for the description of individual cells, similarly to  
337 ones used in<sup>35-37,38</sup>, but generalized for a curved 2-dimensional surface in 3-dimensional  
338 space.

339 We believe that further studies of EHT will shed light on complex HSPC genesis, a  
340 fundamental example of developmental process with important applications in tissue  
341 engineering and regenerative therapies, but also on mechanical processes resulting in the  
342 development of pathologies. Finally, does mechanics prepare the tissue before genetic  
343 reprogramming? It is a debate that is developed in this study in an illustrated way with the  
344 example of HSPCs ontogenesis.



345 **Methods.**

346 **Zebrafish husbandry**

347 *Tg(kdrl:Has.HRAS-mCherry)* (here cited as *kdrl:caax-mCherry*)<sup>39</sup>, *Tg(kdrl:utrophin-CH-*  
348 *GFP)*, *Tg(Cdh5:Gal4//UAS:lifeact:GFP)*<sup>22</sup>, *Tg(kdrl:nls-GFP)*<sup>40</sup>, *Tg(flk-1:mV-zGem)*<sup>20</sup> and  
349 *Tg(cd41:eGFP)*<sup>23</sup> were maintained, crossed, raised and staged as described previously<sup>41,42</sup>.  
350 All animal experiments described in the present study were conducted at the University of  
351 Montpellier according to European Union guidelines for handling of laboratory animals  
352 ([http://ec.europa.eu/environment/chemicals/lab\\_animals/home\\_en.htm](http://ec.europa.eu/environment/chemicals/lab_animals/home_en.htm)) and were approved by  
353 the Direction Sanitaire et Vétérinaire de l'Hérault and Comité d'Ethique pour  
354 l'Expérimentation Animale under reference CEEA-LR-13007.

355

356 **Drug treatments**

357 From 24 h.p.f. onwards, embryos were grown in PTU-containing medium to block  
358 pigmentation. Embryos were dechorionated and treated with different drugs after the start of  
359 circulation at 26 h.p.f. Drugs were dissolved in DMSO as stock solution and diluted in E3  
360 medium up to 1% DMSO final concentration. Control embryos were subjected to the same  
361 concentration of DMSO as treated embryos. Embryos were treated with 2µM Latrunculin B,  
362 0.8µM Blebbistatin, 50µM Rac inhibitor NSC23766 for or 50µM Rho-kinase (ROCK)  
363 inhibitor Y-27632. Embryos were kept in drug solution until image acquisition and  
364 appropriate concentrations of drugs were added to the mounting medium for time-lapse  
365 acquisitions.

366

367 **Quantification of HSPC colonization using *Tg(cd41:eGFP)***

368 To quantify cd41+ cells in the CHT, embryos were imaged under a fluorescent binocular  
369 scope Zeiss V12 at 100X at 52 h.p.f. and 72 h.p.f. Cd41+ cells were then counted using  
370 ImageJ.

371

372 **Microscopy**

373 Fluorescence images of transgenic embryos were acquired using Zeiss LSM510 at 20X.  
374 Time-lapse imaging was performed using Zeiss LSM510 at 20X or 40X magnification  
375 essentially as described<sup>43</sup>. Embryos were anesthetised with tricaine (0.016%) and mounted on  
376 a glass petri dish with 0.7 % low melting agarose and covered with standard E3 medium  
377 supplemented with tricaine and 1-phenyl-2-thiourea (PTU) (0.003%) to prevent pigment  
378 formation. Temperature was maintained at 28°C by placing the dish in a temperature-control  
379 chamber during time-lapse acquisitions. Images were analysed using ImageJ and Imaris  
380 (Bitplane).

381

382

383

## 384 **Aorta diameter measurement**

385 To measure aorta diameter *Tg(kdrl:caax-mCherry)* embryos were imaged using Zeiss  
386 LSM510 as described above. Aorta diameter was measured manually using ImageJ at 10  
387 different points along the trunk which were then averaged. To show aorta diameter evolution  
388 through time, the aorta was measured every 2.5 hours in 5 embryos.

389

## 390 **Cell surface area measurements**

391 Cell surface area was measured using the Surface Contour tool of the Imaris software  
392 (Bitplane). Briefly, the contour of a given cell was outlined on the different stacks where the  
393 cell was visible using the Click drawing mode. The software then calculated automatically the  
394 total cell surface area ( $\mu\text{m}^2$ ). A total of 6 ECs starting to emerge from the aorta floor and 5  
395 ECs on the side of the aorta were analysed in 5 different embryos.

396

## 397 **Statistical analysis**

398 Normal distributions were analysed using Shapiro–Wilk test. Non-Gaussian data were  
399 analysed using Wilcoxon or Kruskal–Wallis test, Gaussian with Student’s *t*-test or analysis of  
400 variance followed by Holm’s multiple comparison.  $P < 0.05$  was considered as statistically  
401 significant. Statistical analyses were performed using R software.

402

## 403 **Bibliography.**

- 404 1. Lis, R. *et al.* Conversion of adult endothelium to immunocompetent haematopoietic stem  
405 cells. *Nature* **545**, 439–445 (2017).
- 406 2. Batta, K., Florkowska, M., Kouskoff, V. & Lacaud, G. Direct Reprogramming of Murine  
407 Fibroblasts to Hematopoietic Progenitor Cells. *Cell Rep.* **9**, 1871–1884 (2014).
- 408 3. Riddell, J. *et al.* Reprogramming Committed Murine Blood Cells to Induced Hematopoietic  
409 Stem Cells with Defined Factors. *Cell* **157**, 549–564 (2014).
- 410 4. Lancrin, C. *et al.* The haemangioblast generates haematopoietic cells through a haemogenic  
411 endothelium stage. *Nature* **457**, 892–895 (2009).
- 412 5. Ivanovs, A. *et al.* Human haematopoietic stem cell development: from the embryo to the dish.  
413 *Development* **144**, 2323–2337 (2017).
- 414 6. Hamill, O. P. & Martinac, B. Molecular Basis of Mechanotransduction in Living Cells. *Physiol.*  
415 *Rev.* **81**, 685–740 (2001).
- 416 7. Eyckmans, J., Boudou, T., Yu, X. & Chen, C. S. A Hitchhiker’s Guide to Mechanobiology. *Dev.*  
417 *Cell* **21**, 35–47 (2011).
- 418 8. Modesto, K. & Sengupta, P. P. Myocardial mechanics in cardiomyopathies. *Prog. Cardiovasc.*  
419 *Dis.* **57**, 111–24 (2014).
- 420 9. Desprat, N., Supatto, W., Pouille, P.-A., Beaurepaire, E. & Farge, E. Tissue Deformation  
421 Modulates Twist Expression to Determine Anterior Midgut Differentiation in *Drosophila*  
422 Embryos. *Dev. Cell* **15**, 470–477 (2008).

- 423 10. Gering, M. & Patient, R. Hedgehog Signaling Is Required for Adult Blood Stem Cell Formation  
424 in Zebrafish Embryos. *Dev. Cell* **8**, 389–400 (2005).
- 425 11. Tavian, M. & Péault, B. Embryonic development of the human hematopoietic system. *Int. J.*  
426 *Dev. Biol.* **49**, 243–50 (2005).
- 427 12. Murayama, E. *et al.* Tracing hematopoietic precursor migration to successive hematopoietic  
428 organs during zebrafish development. *Immunity* **25**, 963–975 (2006).
- 429 13. Kissa, K. *et al.* Live imaging of emerging hematopoietic stem cells and early thymus  
430 colonization. **111**, 1147–1156 (2008).
- 431 14. Kissa, K. & Herbomel, P. Blood stem cells emerge from aortic endothelium by a novel type of  
432 cell transition. *Nature* **464**, 112–115 (2010).
- 433 15. Bertrand, J. Y. *et al.* Haematopoietic stem cells derive directly from aortic endothelium during  
434 development. *Nature* **464**, 108–11 (2010).
- 435 16. Robin, C. *et al.* Human Placenta Is a Potent Hematopoietic Niche Containing Hematopoietic  
436 Stem and Progenitor Cells throughout Development. *Cell Stem Cell* **5**, 385–395 (2009).
- 437 17. Kimmel, C. B., Ballard, W. W., Kimmel, S. R., Ullmann, B. & Schilling, T. F. Stages of embryonic  
438 development of the zebrafish. *Dev. Dyn.* **203**, 253–310 (1995).
- 439 18. Chen, M. J., Yokomizo, T., Zeigler, B. M., Dzierzak, E. & Speck, N. A. Runx1 is required for the  
440 endothelial to haematopoietic cell transition but not thereafter. *Nature* **457**, 887–891 (2009).
- 441 19. Lancino, M. *et al.* Anisotropic organization of circumferential actomyosin characterizes  
442 hematopoietic stem cells emergence in the zebrafish. *Elife* **7**, (2018).
- 443 20. Fukuhara, S. *et al.* Visualizing the cell-cycle progression of endothelial cells in zebrafish. *Dev.*  
444 *Biol.* **393**, 10–23 (2014).
- 445 21. Burkel, B. M., von Dassow, G. & Bement, W. M. Versatile fluorescent probes for actin  
446 filaments based on the actin-binding domain of utrophin. *Cell Motil. Cytoskeleton* **64**, 822–32  
447 (2007).
- 448 22. Helker, C. S. M. *et al.* The zebrafish common cardinal veins develop by a novel mechanism:  
449 lumen ensheathment. *Development* **140**, 2776–86 (2013).
- 450 23. Lin, H.-F. *et al.* Analysis of thrombocyte development in CD41-GFP transgenic zebrafish. *Blood*  
451 **106**, 3803–10 (2005).
- 452 24. Golushko, I. Y., Rochal, S. B. & Lorman, V. L. Complex instability of axially compressed tubular  
453 lipid membrane with controlled spontaneous curvature. *Eur. Phys. J. E* **38**, 112 (2015).
- 454 25. Alstrøm, P., Eguíluz, V. M., Colding-Jørgensen, M., Gustafsson, F. & Holstein-Rathlou, N.-H.  
455 Instability and “Sausage-String” Appearance in Blood Vessels during High Blood Pressure.  
456 *Phys. Rev. Lett.* **82**, 1995–1998 (1999).
- 457 26. Li, B., Cao, Y.-P., Feng, X.-Q. & Gao, H. Surface wrinkling of mucosa induced by volumetric  
458 growth: Theory, simulation and experiment. *J. Mech. Phys. Solids* **59**, 758–774 (2011).
- 459 27. Muñoz, M. A. *Colloquium* : Criticality and dynamical scaling in living systems. *Rev. Mod. Phys.*  
460 **90**, 031001 (2018).
- 461 28. Santoro, M. M., Pesce, G. & Stainier, D. Y. Characterization of vascular mural cells during  
462 zebrafish development. *Mech. Dev.* **126**, 638–649 (2009).

- 463 29. Campàs, O. A toolbox to explore the mechanics of living embryonic tissues. *Semin. Cell Dev.*  
464 *Biol.* **55**, 119–130 (2016).
- 465 30. Wyatt, T., Baum, B. & Charras, G. A question of time: tissue adaptation to mechanical forces.  
466 *Curr. Opin. Cell Biol.* **38**, 68–73 (2016).
- 467 31. Landau, L. D., Lifshitz, E. M., Pitaevskii, L. P., Sykes, J. B. & Kearsley, M. J. *Statistical physics.*  
468 *Volume 5 of Course of theoretical physics. Part 1.*
- 469 32. Timoshenko, S. & Goodier, J. N. *Theory of Elasticity.* (1951).
- 470 33. Guillot, C. & Lecuit, T. Mechanics of Epithelial Tissue Homeostasis and Morphogenesis. *Science*  
471 *(80-. ).* **340**, 1185–1189 (2013).
- 472 34. Rosenblatt, J., Raff, M. C. & Cramer, L. P. An epithelial cell destined for apoptosis signals its  
473 neighbors to extrude it by an actin- and myosin-dependent mechanism. *Curr. Biol.* **11**, 1847–  
474 1857 (2001).
- 475 35. Bi, D., Yang, X., Marchetti, M. C. & Manning, M. L. Motility-Driven Glass and Jamming  
476 Transitions in Biological Tissues. *Phys. Rev. X* **6**, 021011 (2016).
- 477 36. Farhadifar, R., Röper, J.-C., Aigouy, B., Eaton, S. & Jülicher, F. The influence of cell mechanics,  
478 cell-cell interactions, and proliferation on epithelial packing. *Curr. Biol.* **17**, 2095–104 (2007).
- 479 37. Merkel, M. *et al.* Triangles bridge the scales: Quantifying cellular contributions to tissue  
480 deformation. *Phys. Rev. E* **95**, 032401 (2017).
- 481 38. Krajnc, M., Dasgupta, S., Zihlerl, P. & Prost, J. Fluidization of epithelial sheets by active cell  
482 rearrangements. *Phys. Rev. E* (2018). doi:10.1103/PhysRevE.98.022409
- 483 39. Chi, N. C. *et al.* Foxn4 directly regulates tbx2b expression and atrioventricular canal formation.  
484 *Genes Dev.* **22**, 734–9 (2008).
- 485 40. Blum, Y. *et al.* Complex cell rearrangements during intersegmental vessel sprouting and vessel  
486 fusion in the zebrafish embryo. *Dev. Biol.* **316**, 312–22 (2008).
- 487 41. Kimmel, C. B., Ballard, W. W., Kimmel, S. R., Ullmann, B. & Schilling, T. F. Stages of embryonic  
488 development of the zebrafish. *Dev Dyn* **203**, 253–310 (1995).
- 489 42. Westerfield, M. *The Zebrafish Book. A Guide for the Laboratory Use of Zebrafish (Danio rerio),*  
490 *4th Edition.* (2000).
- 491 43. Renaud, O., Herbomel, P. & Kissa, K. Studying cell behavior in whole zebrafish embryos by  
492 confocal live imaging: application to hematopoietic stem cells. *Nat. Protoc.* **6**, 1897–904  
493 (2011).

494

495

496

## 497 **Acknowledgements**

498 We thank Etienne Lelièvre for his critical reading of the manuscript, A. Sahuquet, C.  
499 Chevalier, V. Diakou for their assistance and the MRI facility, N. Abdellaoui for management  
500 of zebrafish facility. D. Stainier lab for *Tg(Cdh5:Gal4//UAS:lifeact:GFP)*, S. Shulte-Merker  
501 lab for *Tg(kdrl:utrophin-CH-GFP)* and *Tg(kdrl:nls-GFP)* and National Bioresource Project  
502 Zebrafish for *Tg(flk-1:mV-zGem)*. This work was supported by the ARC, FRM, ATIP-Avenir  
503 fellowships and a fellowship from the Région Languedoc-Roussillon, Chercheur d'Avenir.  
504 NP was supported by a fellowship from the ATIP-Avenir, SR and IG are grateful to the RSF  
505 grant N 19-12-00032, AP, IG and SR acknowledge NUMEV (AAP-2016-2-025) for financial  
506 support. I.G.'s thesis was funded by Campus France (Vernadsky Fellowship) and the France-  
507 Russia Cooperation Program, and JT by a fellowship from the MESR and the FRM.

508

## 509 **Disclosure of Conflicts of Interest**

510 The authors declare no competing financial interests.

511

512

## 513 **Figure 1. Aorta remodelling during EHT: embryo anatomy and spatiotemporal** 514 **organisation of aorta diameter.**

515 **a.** Drawing showing the AGM localization in the trunk of a 48 h.p.f. zebrafish. Scheme of the  
516 AGM in longitudinal or transverse views (grey boxes) consisting of the neural tube, the  
517 notochord, the dorsal aorta, the cardinal vein, and the yolk tube. **b-f.** Still frames of time-lapse  
518 imaging of *Tg(kdrl:caax-mCherry)* embryo from 30-65 h.p.f. Maximum projection from 40 z-  
519 stack spaced by 1µm. Double-headed arrows indicate difference of aorta diameter through  
520 time. **b-c.** Between 30 and 42.5 h.p.f., DA diameter expands. Arrowheads indicate  
521 localization of cells leaving the aorta and forming a local reduction of the diameter. **d.** Image  
522 of *Tg(kdrl:caax-mCherry)* embryo at 50 h.p.f. to illustrate DA diameter measurements  
523 throughout the length of 3 somites as represented in **h**. **e.** From 45 to 65 h.p.f., DA diameter  
524 decreases, corresponding to the peak and then decline of EHT events. Arrows indicate the  
525 contraction of the aorta occurring from the floor. **f.** After EHT, at 65 h.p.f, aorta floor  
526 becomes flat. **g.** Graph showing aorta diameter variation in time measured every 2.5h in 5  
527 embryos. Letters correspond to the according panels. Error bars represent standard error of the  
528 mean. **h.** Graph showing variation of diameter along the antero/posterior axis at 3 time points:  
529 50, 55 and 60 h.p.f. (Black box from **g**) in the embryo imaged in **b-f**. Dotted line indicates  
530 intersomitic vessels. Blue arrowheads indicate localization of EHT cells leaving the aorta and  
531 forming a local reduction of the diameter. **i.** Graph showing the number of EC divisions  
532 (*kdrl:mV-zGmn<sup>+</sup>* cells) occurring between 27 and 72 h.p.f. in the trunk and in the tail region,  
533 n=10 cells. Note that a peak of division is observed in the tail region between 36 and 54 h.p.f.  
534 corresponding to the formation of the CHT and its colonisation by HSPC. DA: dorsal aorta;  
535 isv: intersomitic vessel; CV: cardinal vein. Scale bar: 25 µm. See also **Supplementary Movie**  
536 **S1.**

537

538 **Figure 2. Cells undergoing EHT are recruited from the side of the aorta and migrate to**  
539 **its floor prior to extrusion.**

540 **a-c.** From 30 to 60 h.p.f., still frames of time-lapse imaging of *Tg(kdrl:ns-GFP)/Tg(kdrl:caax-*  
541 *mCherry)* embryo. Maximum projection from 40 z-stack spaced by 1 $\mu$ m. Stars indicate the  
542 nucleus of the ECs in the dorsal aorta in the 2 central somites of the image. **d-h.** Still frames  
543 of time-lapse imaging of *Tg(kdrl:ns-GFP)/Tg(kdrl:caax-mCherry)* embryo. Maximum  
544 projection from 40 z-stack spaced by 0.6 $\mu$ m. Cells migrating from the side of the aorta toward  
545 the floor are numbered 1 and 2 in white. **i.** Graph showing the number of nuclei counted in 3  
546 different zones of the dorsal aorta: roof, side and floor, n=5 cells. **j.** Schematic representation  
547 of cell rearrangement occurring from 30 to 60 h.p.f. Colour coding of the cells corresponds to  
548 the graph in i. DA: dorsal aorta; CV: cardinal vein. Scale bar: 25  $\mu$ m (**a-c**), 10 $\mu$ m (**d-h**).

549

550 **Figure 3. Endothelial cells adopt collaborative behaviour during EHT: cellular**  
551 **contractions and extensions to maintain aorta integrity.**

552 **a-d.** Still frames of time-lapse imaging of *Tg(kdrl:ns-GFP)/Tg(kdrl:utrophin-CH-GFP)*  
553 embryo between 40 and 60 h.p.f. Maximum projection from 40 z-stack spaced by 0.6 $\mu$ m. Cell  
554 A (highlighted in orange) is an endothelial cell located in the floor of the aorta and starting to  
555 undergo EHT. Cell A surface reduces importantly between 42 h.p.f. (**a**) and 60 h.p.f. (**b**). Cell  
556 B (highlighted in blue) is located in the side of the aorta neighbouring a cell undergoing EHT  
557 (star). Cell B surface increases between 42 h.p.f. (**c**) and 54 h.p.f. (**d**). **e-f** Schematic  
558 representation of EC surfaces and positions at t1 (**e**) and t2 > t1 (**f**). Colour-code and letters  
559 correspond to the panel **a-d**. **g.** Graph showing the temporal evolution of EC starting to  
560 emerge from the aorta floor in percentage of difference compared to area at 40 or 42 h.p.f.  
561 Each line represents the measurements for one cell. 6 ECs starting to emerge from the aorta  
562 floor were analysed in 5 different embryos. For details on cell area ( $\mu$ m<sup>2</sup>) calculation, see  
563 Material and Methods section. **h.** Graph showing temporal evolution of cell area of lateral EC  
564 in percentage of difference compared to area at 40 or 42 h.p.f. Each line represents the  
565 measurements for one cell. 5 ECs on the side of the aorta were analysed in 5 different  
566 embryos. Scale bar: 10 $\mu$ m.

567

568 **Figure 4. Final contraction in EHT is actin-dependent and coordinated with**  
569 **surrounding cells.**

570 **a-c.** Horizontal reconstructed view from a maximum projection of a series of z-stack of a  
571 *Tg(kdrl:utr-CH-GFP)/Tg(kdrl:caax-mCherry)* embryo during EHT at 42, 44 and 46 h.p.f.  
572 Upper panels are *kdrl:utrophin-CH-GFP* alone and lower panels are merged images with  
573 *kdrl:caax-mCherry*. Closure of the actin ring by the neighbouring cells is clearly observable  
574 in the upper panels. See also **Supplementary Movie S3**. **d-f.** Single z-stacks of time-lapse  
575 imaging of the same embryo as in **a-c**. Upper panels are *kdrl:utrophin-CH-GFP* alone and  
576 middle panels are merged images with *kdrl:caax-mCherry*. Actin ring (arrows) closes around  
577 emerging cell (arrowhead). Note that in this case the emerging cell does not express Utrophin-  
578 CH-GFP due to mosaic labelling, allowing us to confirm the role of the neighbouring cells in  
579 actin ring closure.

580

581 **Figure 5. Overall schematic representation of Endothelial-to-Haematopoietic Transition**  
582 **with mechanical instabilities. a.** The EHT transition starts first by a global aorta dilation (as  
583 soon as the heart starts to beat), taking place from 24 to about 42,5 h.p.f., followed by the  
584 aorta contraction, occurring from about 42,5 to 65 h.p.f. While the embryo is growing and  
585 developing, the first phase of aorta dilation is essentially characterized by cells that start to  
586 increase their area, while others, in particular those located on the sides of the aorta, migrate  
587 towards the ventral part (aorta floor). During this phase the characteristic modulation of the  
588 aorta diameter, the corrugation instability (see main text and below), appears.

589 In the contraction phase, cells localized at the aorta floor undergo a drastic morphological  
590 change, shaping from flat ECs to round plate-like cells. As cells round up, they undergo a  
591 strong antero-posterior contraction. In parallel, neighbouring ECs compensate for the surface  
592 reduction of emerging cells, and eventually for the extrusion of the latter cells from the aorta,  
593 by increasing importantly their surface. Finally emerging round cells extrude and  
594 individualize from the aorta. This phase coincides with the decrease of the diameter  
595 modulation, recovering the initial aorta diameter and its cylindrical geometry.

596 **b-c-d.** The three main mechanical instability modes of a thin cylindrical soft pipe (membrane)  
597 under mechanical stresses: **b.** Longitudinal buckling; **c.** Transverse buckling; **d.** Corrugation.

598

**Figure 1. Aorta remodelling during EHT: embryo anatomy and spatiotemporal organisation of aorta diameter**

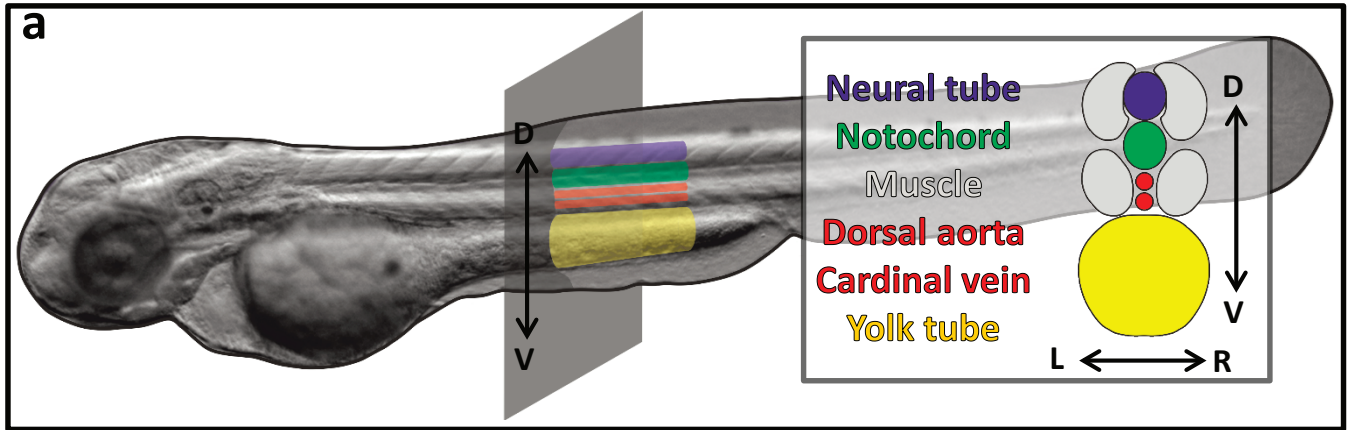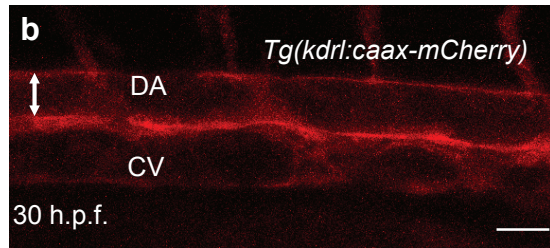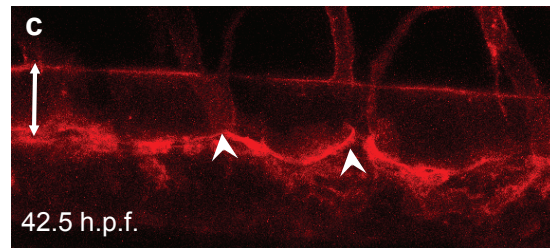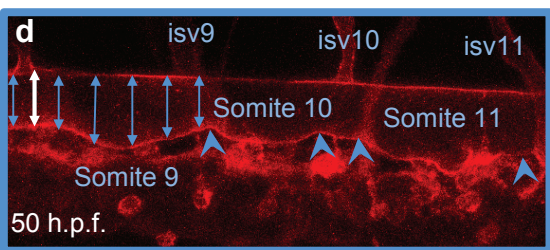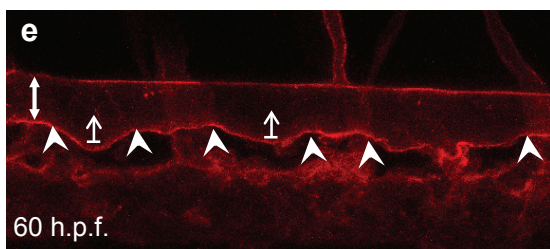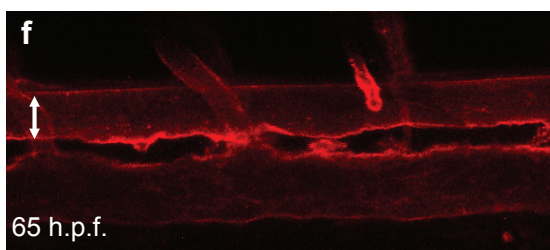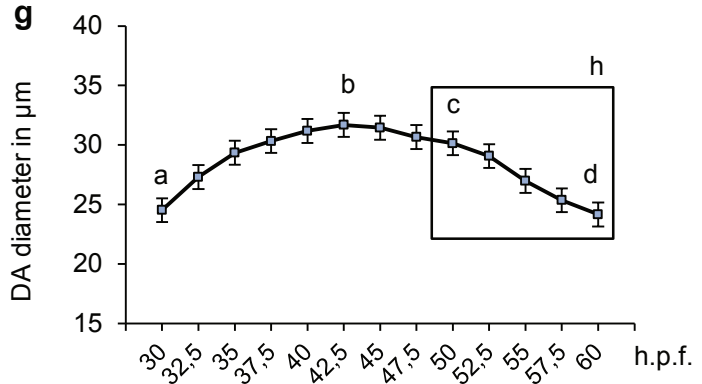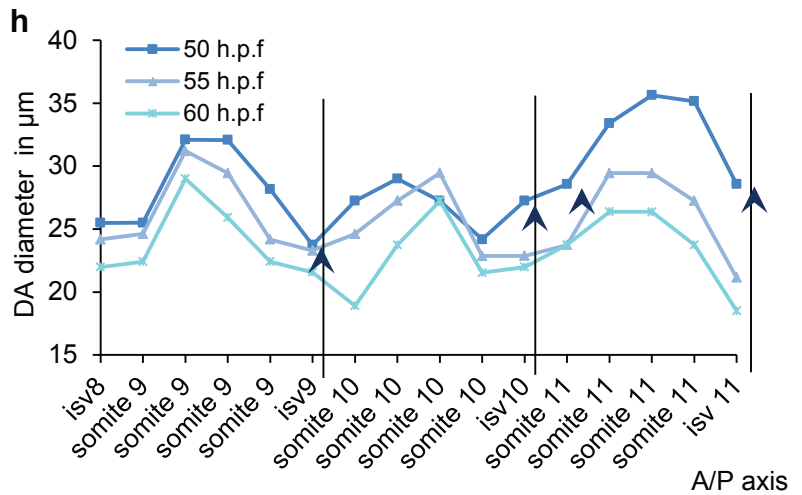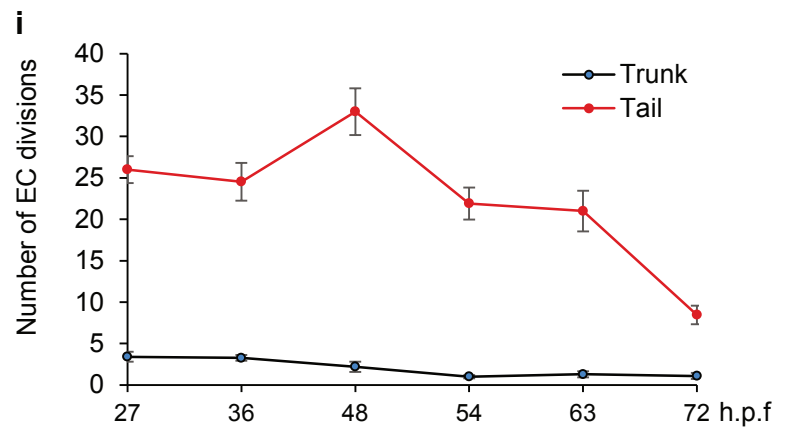



**Figure 2. Cells undergoing EHT are recruited from the middle of the aorta and migrate to its floor prior to extrusion.**

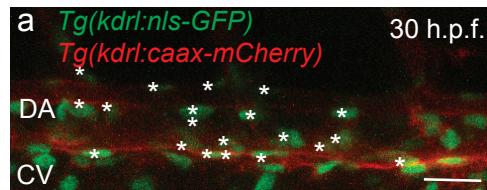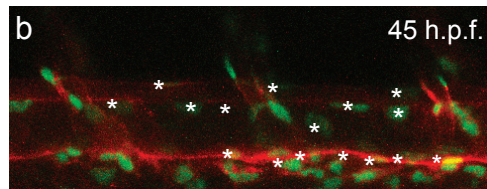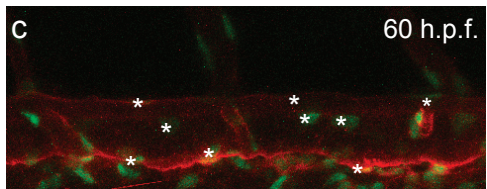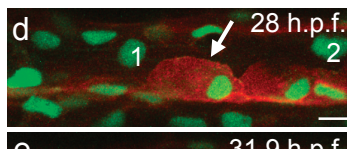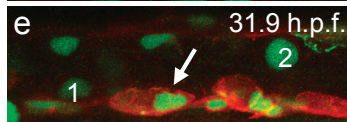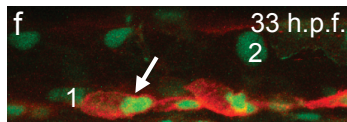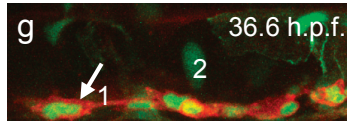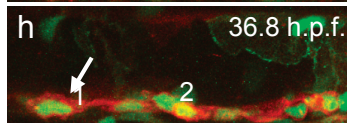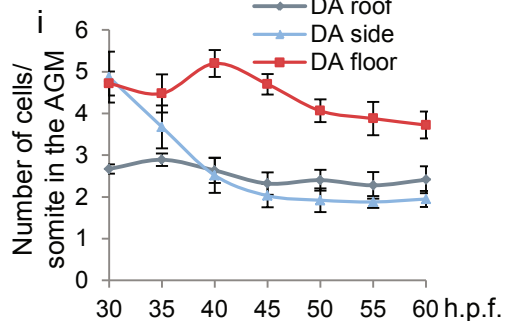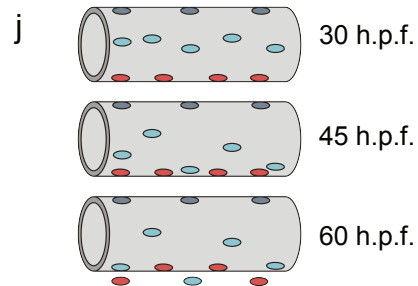

# Figure 3. Endothelial cells adopt collaborative behaviour during EHT: cellular contractions and extensions to maintain aorta integrity.

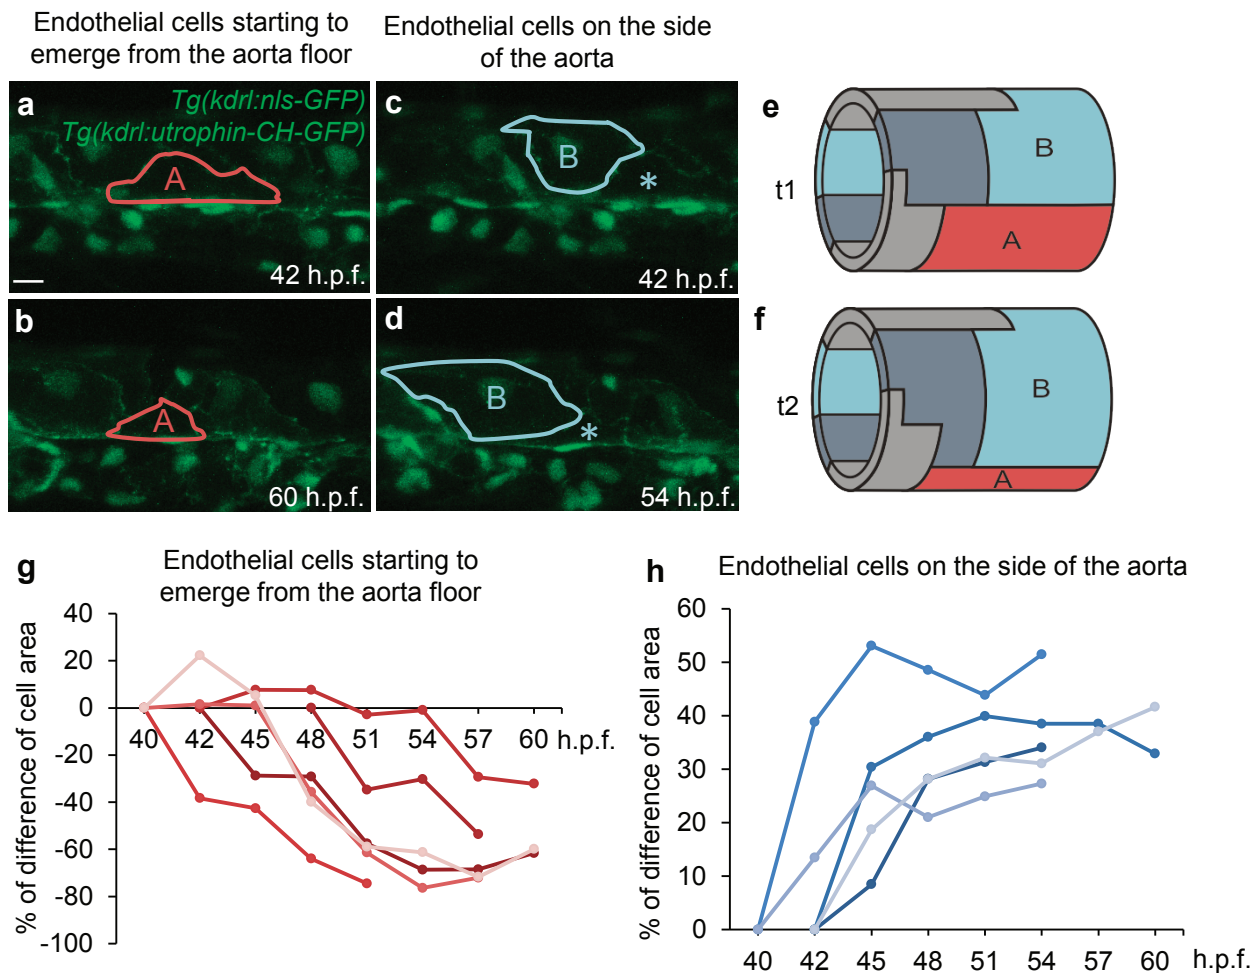

**Figure 4. Final contraction in EHT is actin-dependent and coordinated with surrounding cells.**

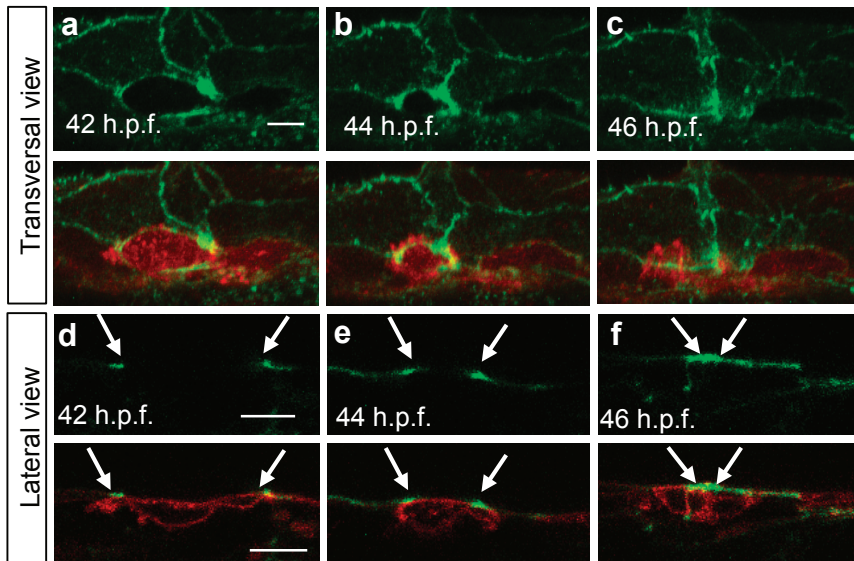

**Figure 5. Overall schematic representation of Endothelial-to-Haematopoietic Transition with mechanical instabilities**

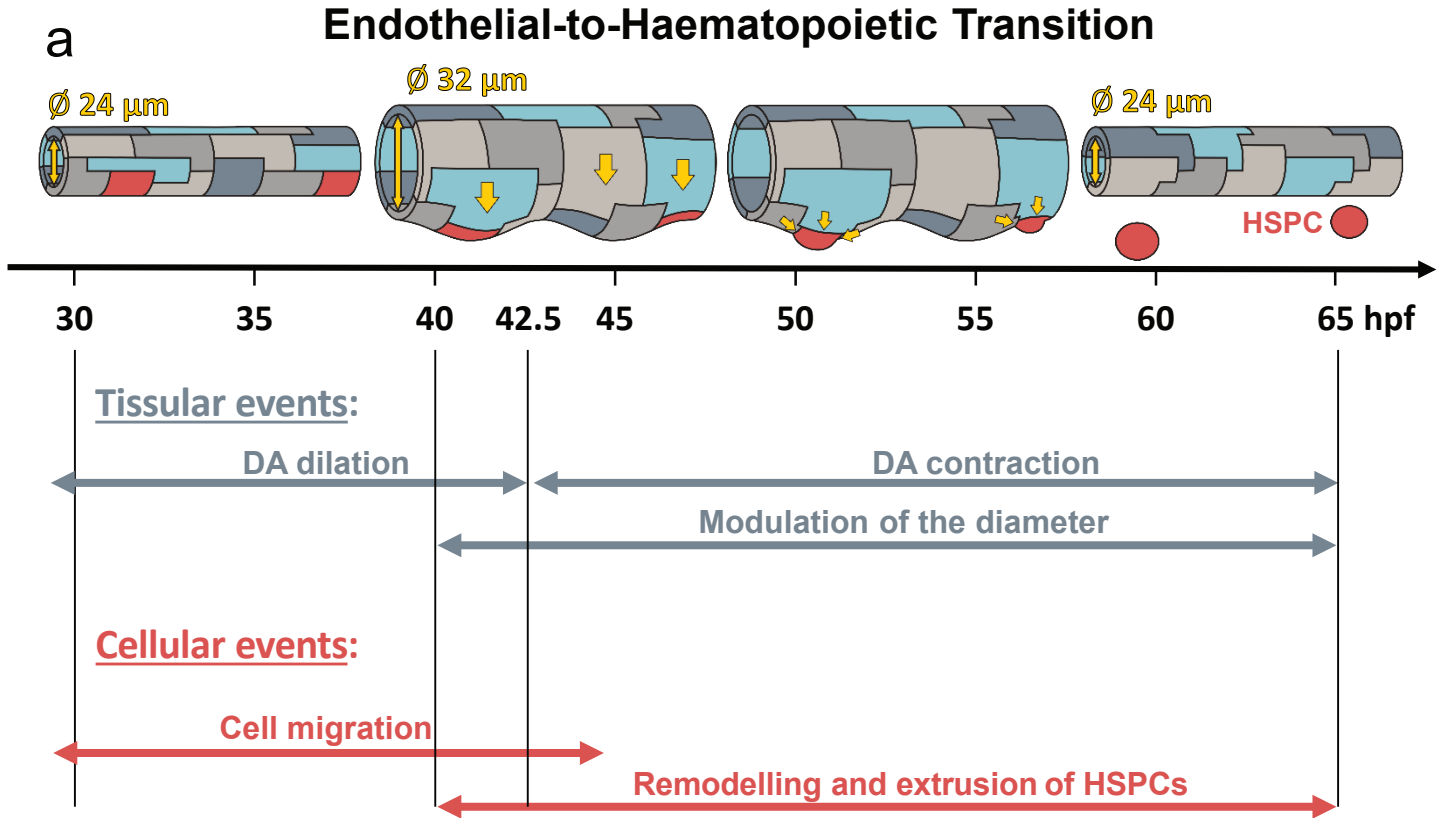

**Mechanical instabilities**

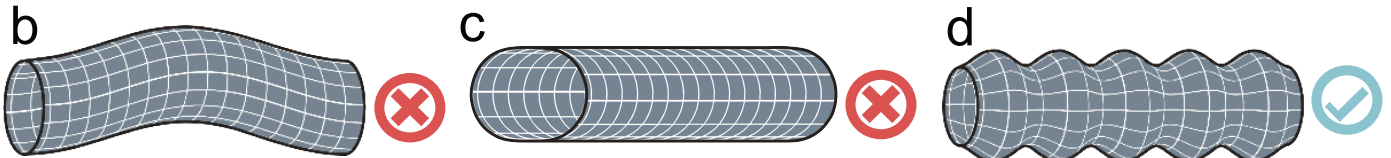

Source: https://www.biorxiv.org/content/10.1101/509190v1.full.pdf
